# Supplementary material
Source: PubMed Central journal article supplement (PMC8270664)
Supplement: advancesADV2020003624-suppl1.pdf [file advancesADV2020003624-suppl1.pdf]

**Table S1**

| Drugs                          | Manufacturer      | Concentrations |           |            |
|--------------------------------|-------------------|----------------|-----------|------------|
|                                |                   | MM1.s          | OPM-2     | L363       |
| <b>Drugs in screen</b>         |                   |                |           |            |
| Melphalan                      | Sigma-Aldrich     | 2.5 $\mu$ M    | 5 $\mu$ M | 10 $\mu$ M |
| Vincristine                    | Selleck Chemicals | 20 nM          | 3 nM      | 3 nM       |
| Dexamethasone                  | Sigma-Aldrich     | 100 nM         | 12.5 nM   | 100 nM     |
| Bortezomib                     | Tebu Bio          | 4 nM           | 4 nM      | 8 nM       |
| Panobinostat (LBH589)          | Selleck Chemicals | 5 nM           | 5 nM      | 20 nM      |
| BCL-2i ABT-199 / Venetoclax    | LKT Laboratories  | 100 nM         | 100 nM    | 100 nM     |
| MCL-1i S63845                  | Servier           | 100 nM         | 10 nM     | 10 nM      |
| BCL-XLi A-1155463              | MedChemExpress    | 100 nM         | 100 nM    | 100 nM     |
| <b>Other drugs in study</b>    |                   |                |           |            |
| Rapamycin (Sirolimus)          | Selleck Chemicals |                |           |            |
| P70S6K1 inhibitor (PF-4708671) | Selleck Chemicals |                |           |            |
| Copanlisib (BAY 80-6946)       | Selleck Chemicals |                |           |            |
| Prednisolone                   | Sigma-Aldrich     |                |           |            |

**Supplemental Table 1. Overview of drugs.** Overview of drugs incorporated in this study, with specified concentrations used per HMCL for the lethality screen.

**Table S2**

| Characteristics            | MM1                               | MM2   | MM3                               | MM4    | MM5              | MM6                                | MM7              | MM8    | MM9    |
|----------------------------|-----------------------------------|-------|-----------------------------------|--------|------------------|------------------------------------|------------------|--------|--------|
| Age at diagnosis, y        | 53                                | 52    | 59                                | 66     | 80               | 55                                 | 51               | 68     | 48     |
| Sex                        | female                            | male  | male                              | male   | male             | male                               | male             | male   | male   |
| Plasma cells, %            | 38                                | 70    | 67                                | 70     | 20               | 75                                 | 34               | 36     | 37     |
| Immunoglobulin type        | IgG                               | IgG   | nd                                | IgG    | IgA              | IgA                                | IgG              | nd     | IgG    |
| Light chain type           | lambda                            | kappa | lambda                            | lambda | kappa            | lambda                             | kappa            | lambda | lambda |
| ISS stage at diagnosis     | 1                                 | 1     | 3                                 | 1      | 1                | 2                                  | 3                | 1      | 3      |
| <b>Cytogenetics</b>        |                                   |       |                                   |        |                  |                                    |                  |        |        |
| hyperdiploidy              | no                                | yes   | no                                | yes    | yes              | nd                                 | no               | no     | no     |
| amplifications / deletions | 1q <sup>+</sup> ,13q <sup>-</sup> | no    | 1q <sup>+</sup> ,13q <sup>-</sup> | no     | 13q <sup>-</sup> | 1q <sup>+</sup> , 13q <sup>-</sup> | 13q <sup>-</sup> | no     | no     |
| translocations             | t(14;20)                          | no    | no                                | no     | no               | t(4;14)                            | t(14;16)         | no     | no     |

**Supplemental Table 2. Overview of clinical characteristics and cytogenetics of MM patients.** MM1-MM9 indicate the 9 unique MM patients included in this study. ISS, international staging system; y, year; nd, no data.

**Table S3**

| Antibody                       | Clone     | Manufacturer   |
|--------------------------------|-----------|----------------|
| rabbit anti-MCL-1              | Y37       | Abcam          |
| mouse anti-BCL-2               | 124       | Cell Signaling |
| rabbit anti-BCL-XL             | 54H6      | Cell Signaling |
| rabbit anti-FOXO1              | C29H4     | Cell Signaling |
| rabbit anti-FOXO3a             | D19A7     | Cell Signaling |
| rabbit anti-pGSK3 $\beta$ Ser9 | D85E12    | Cell Signaling |
| rabbit anti-4E-BP1             | 53H11     | Cell Signaling |
| rabbit anti-p4E-BP1 Thr37/46   | 236B4     | Cell Signaling |
| rabbit anti-P70S6K             | 49D7      | Cell Signaling |
| rabbit anti-pP70S6K Thr389     | 108D2     | Cell Signaling |
| mouse anti-S6                  | 54D2      | Cell Signaling |
| rabbit anti-pS6 Ser235/236     | D57.2.2E  | Cell Signaling |
| rabbit anti-pS6 Ser240/244     | D68F8     | Cell Signaling |
| rabbit anti-pAkt Ser473        | D9E       | Cell Signaling |
| mouse anti-Akt                 | 40D4      | Cell Signaling |
| rabbit anti-BIM                | C34C5     | Cell Signaling |
| rabbit anti-pBad Ser136        | D25H8     | Cell Signaling |
| mouse anti-NOXA                | 114C307,1 | Novus Bio      |
| mouse anti- $\alpha$ -tubulin  | DM1A      | Cell Signaling |
| mouse anti-lamin B1            |           | Cusabio        |
| mouse anti-GAPDH               | GA1R      | Invitrogen     |

**Supplemental Table 3. Overview of primary antibodies used for western blots in the study.**

**Figure S1**

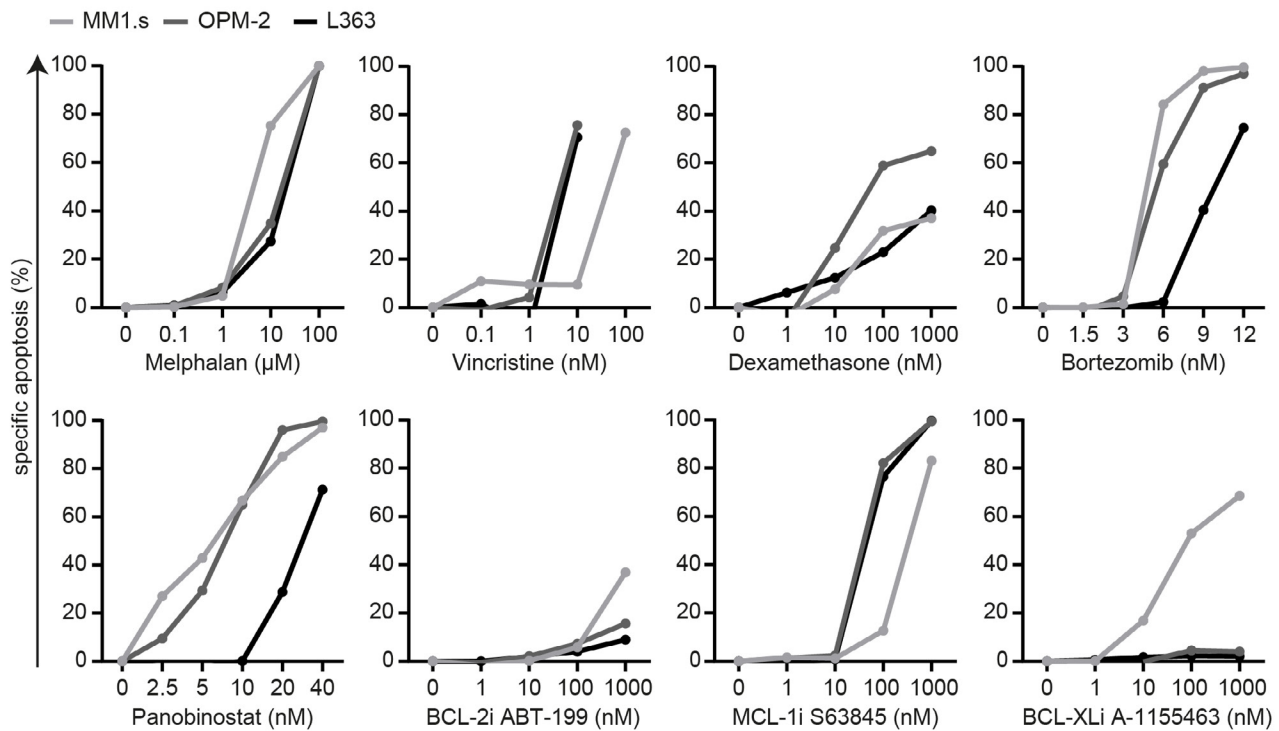

**Supplemental Figure 1. Specific apoptosis induced by increasing concentrations of indicated drugs in HMCLs.** The HMCLs MM1.s, OPM-2 and L363 were exposed to indicated concentrations of melphalan, vincristine, dexamethasone, bortezomib and panobinostat for 48 hours. In addition, HMCLs were exposed to indicated concentrations of BH3-mimetics BCL-2 inhibitor ABT-199, MCL-1 inhibitor S63845 and BCL-XL inhibitor A-1155463 for 24 hours.

**Figure S2**

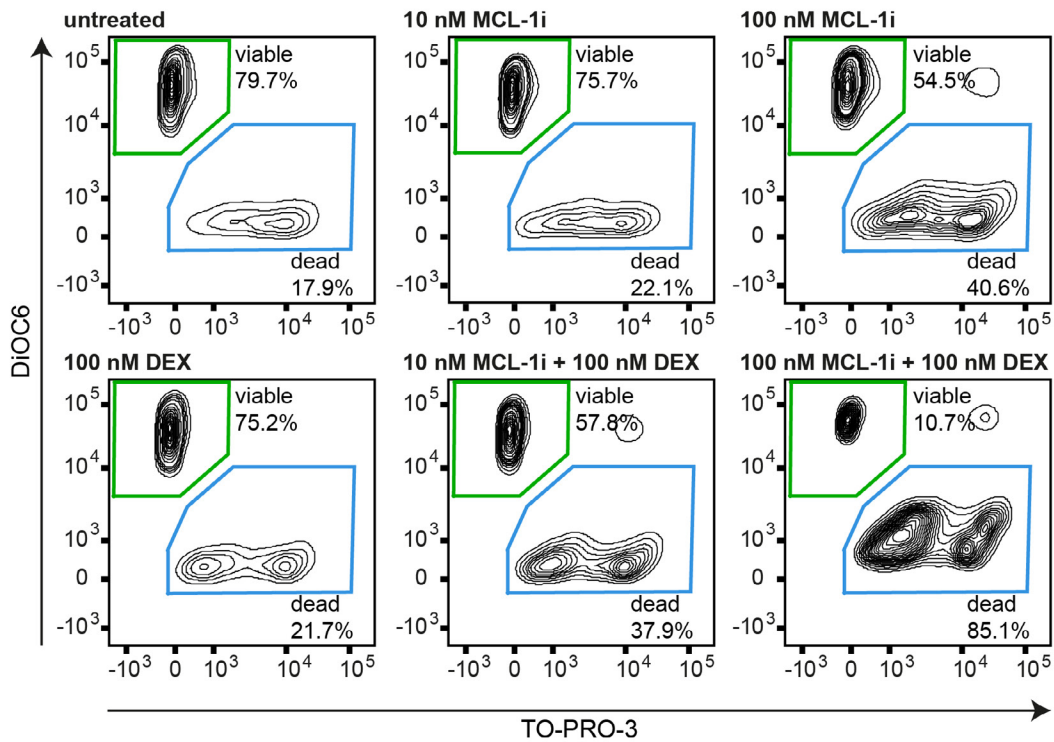

**Supplemental Figure 2. Induction of apoptosis by dexamethasone and MCL-1i.** Representative flow cytometric analysis plots of apoptosis induction in HMCLs after 48 hours of exposure to the indicated concentrations of dexamethasone (DEX) or MCL-1i. Gates represent viable (DiOC6<sup>+</sup>/TO-PRO-3<sup>-</sup>) and dead (DiOC6<sup>-</sup>/TO-PRO-3<sup>+</sup>) MM1.s cells.

**Figure S3**

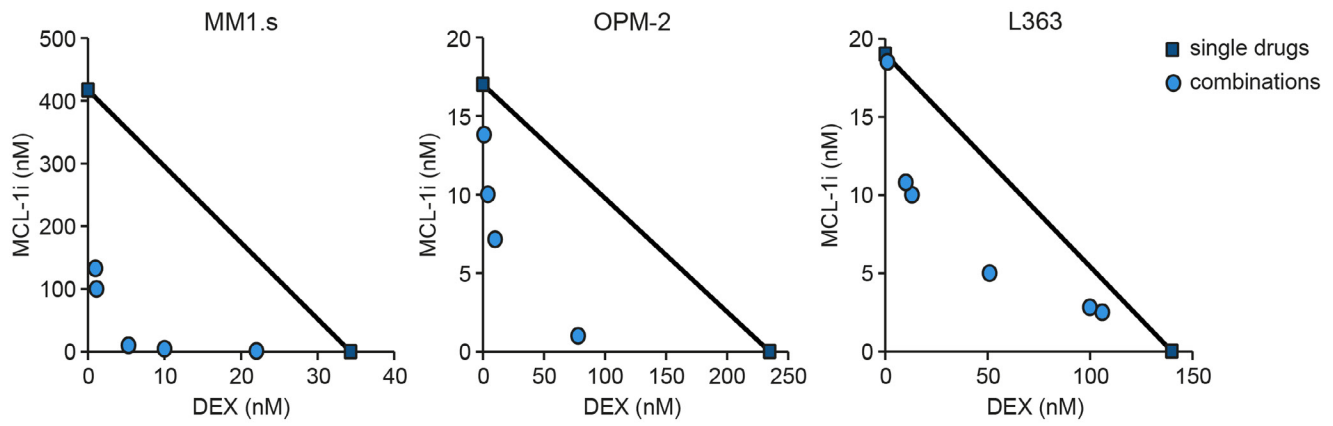

**Supplemental Figure 3. Dexamethasone synergizes with MCL-1i to induce apoptosis of HMCLs.** Representative isobolograms of indicated HMCLs exposed to combinations of dexamethasone (DEX) and MCL-1i for 48 hours. Blue dots indicate the drug combination that induced 50% specific apoptosis (IC<sub>50</sub>) for MM1.s and OPM-2 or 25% specific apoptosis (IC<sub>25</sub>) for L363. The blue squares indicate the IC<sub>50</sub> (MM1.s and OPM-2) or IC<sub>25</sub> (L363) of the single drugs. The black lines connecting both single drug data points indicate an exact additive effect with a combination index (CI) of 1. All data points to the left of this line have a CI < 1, indicating synergy for the drug combination.

**Figure S4**

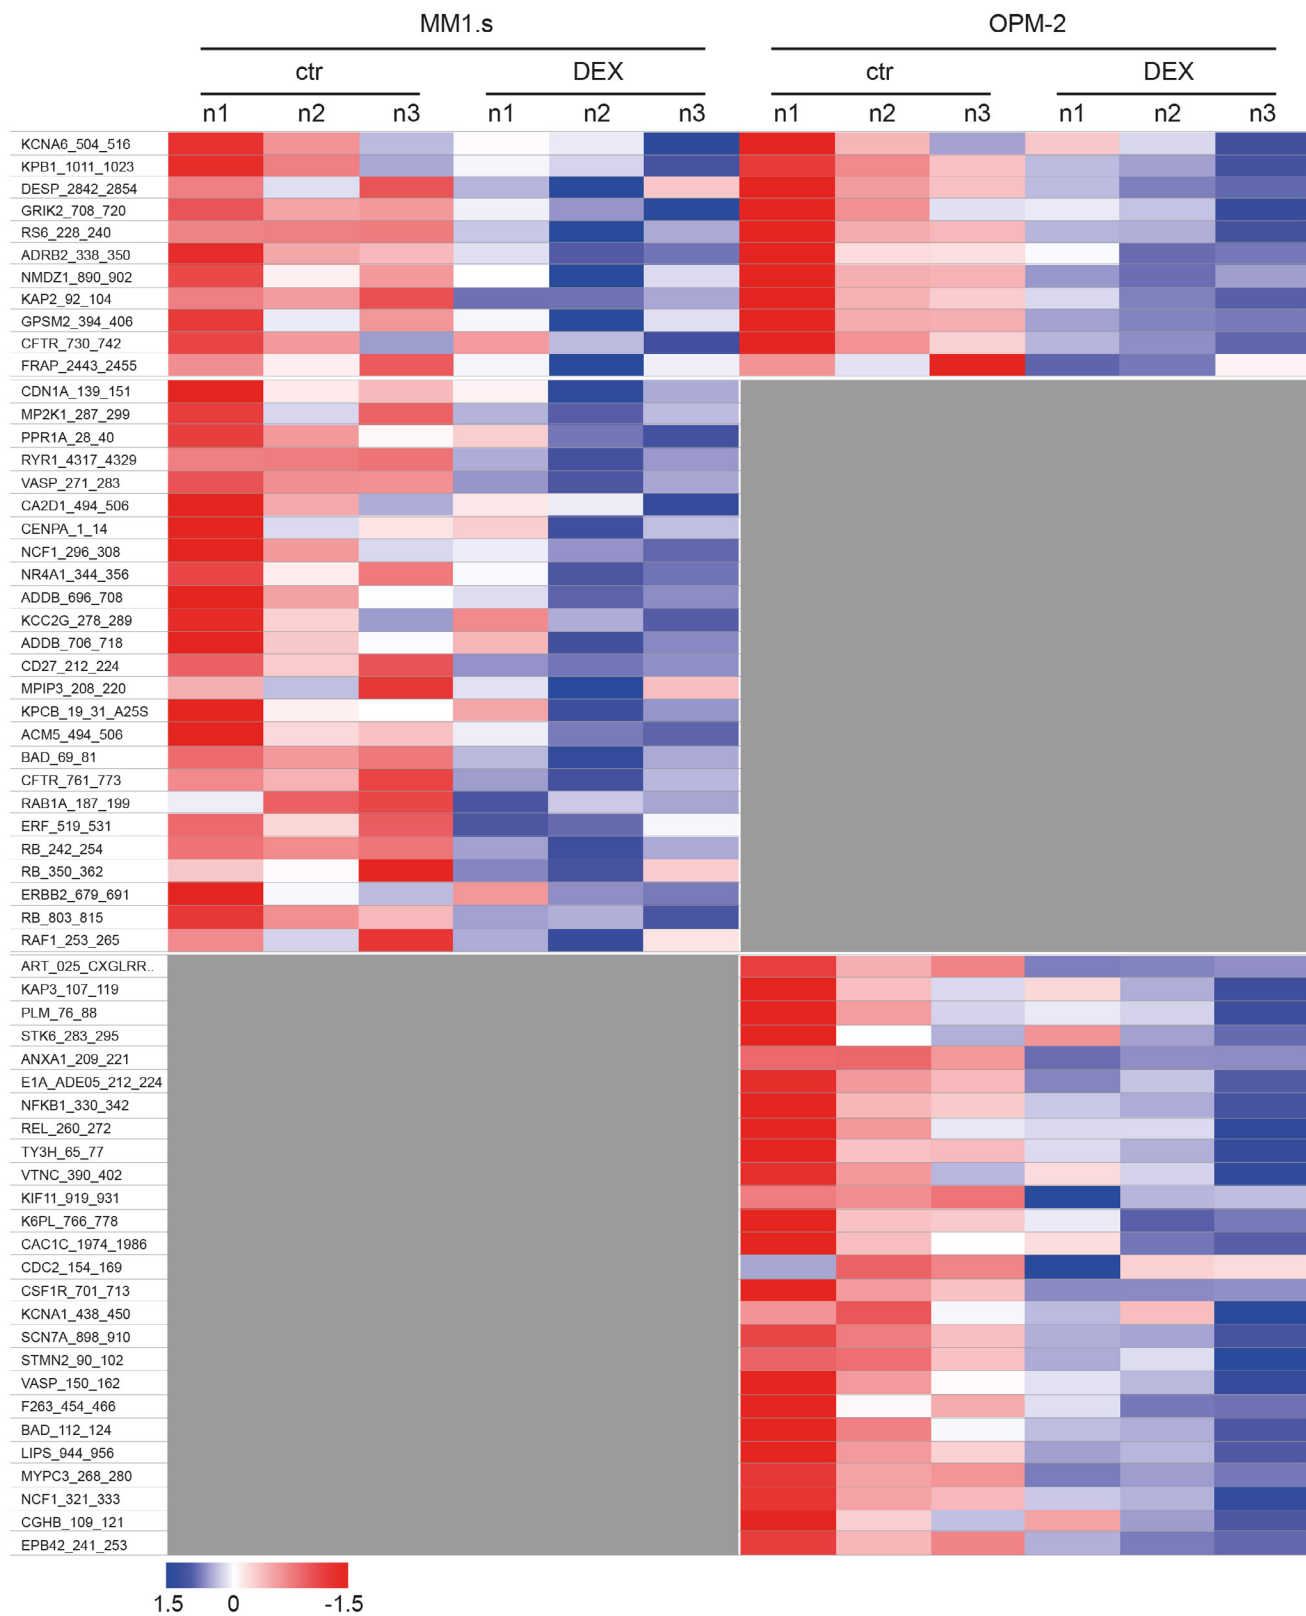

**Supplemental Figure 4. Dexamethasone significantly reduces peptide phosphorylation by STKs in HMCLs.** Heatmap showing peptides with significantly reduced phosphorylation by serine/threonine kinases (STK) in MM1.s and OPM-2 exposed for 4 hours to 1  $\mu$ M dexamethasone (DEX) or DMSO control (ctr). Per treatment group 3 technical replicates were included. Statistical analysis was performed by paired t-tests. Grey fields indicate no statistically significant results for the specific peptides in the indicated HMCL.

**Figure S5**

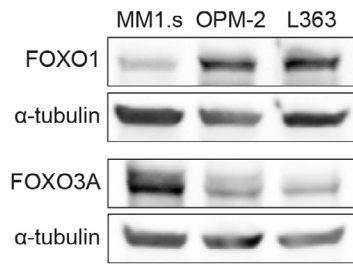

**Supplemental Figure 5. FOXO protein expression in HMCLs.** Western blot showing FOXO1 and FOXO3a protein expression in untreated HMCLs. Alpha-tubulin was used as a loading control.



**Figure S6**

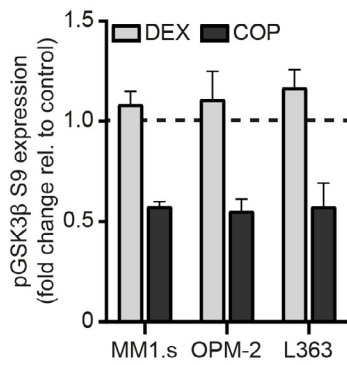

**Supplemental Figure 6. Exposure of HMCLs to dexamethasone does not reduce inhibitory GSK3 $\beta$  phosphorylation.** Quantification of GSK3 $\beta$  phosphorylation on serine residue 9 (pGSK3 $\beta$  S9) in indicated HMCLs exposed to 1  $\mu$ M dexamethasone (DEX) or 100 nM copanlisib (COP) for 4 hours. Quantification was performed on western blots of 2 individual experiments, normalized to  $\alpha$ -tubulin for loading control and relative to untreated control cells, indicated by the dashed line.

**Figure S7**

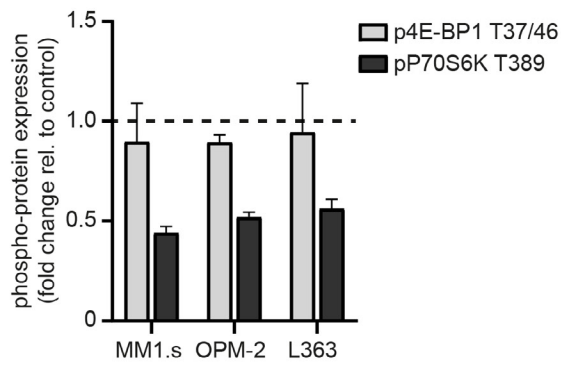

**Supplemental Figure 7. Dexamethasone reduces phosphorylation of mTORC1 substrates 4E-BP1 and P70S6K.** Quantification of 4E-BP1 phosphorylation on threonine 37/46 residues (p4E-BP1 T37/46) and P70S6K phosphorylation on threonine residue 389 (pP706SK T389) in indicated HMCLs exposed to 1  $\mu$ M dexamethasone for 4 hours. Quantification was performed on western blots of 2 individual experiments, normalized to total 4E-BP1 or total P70S6K protein expression for loading control and relative to untreated control cells, indicated by the dashed line.

**Figure S8**

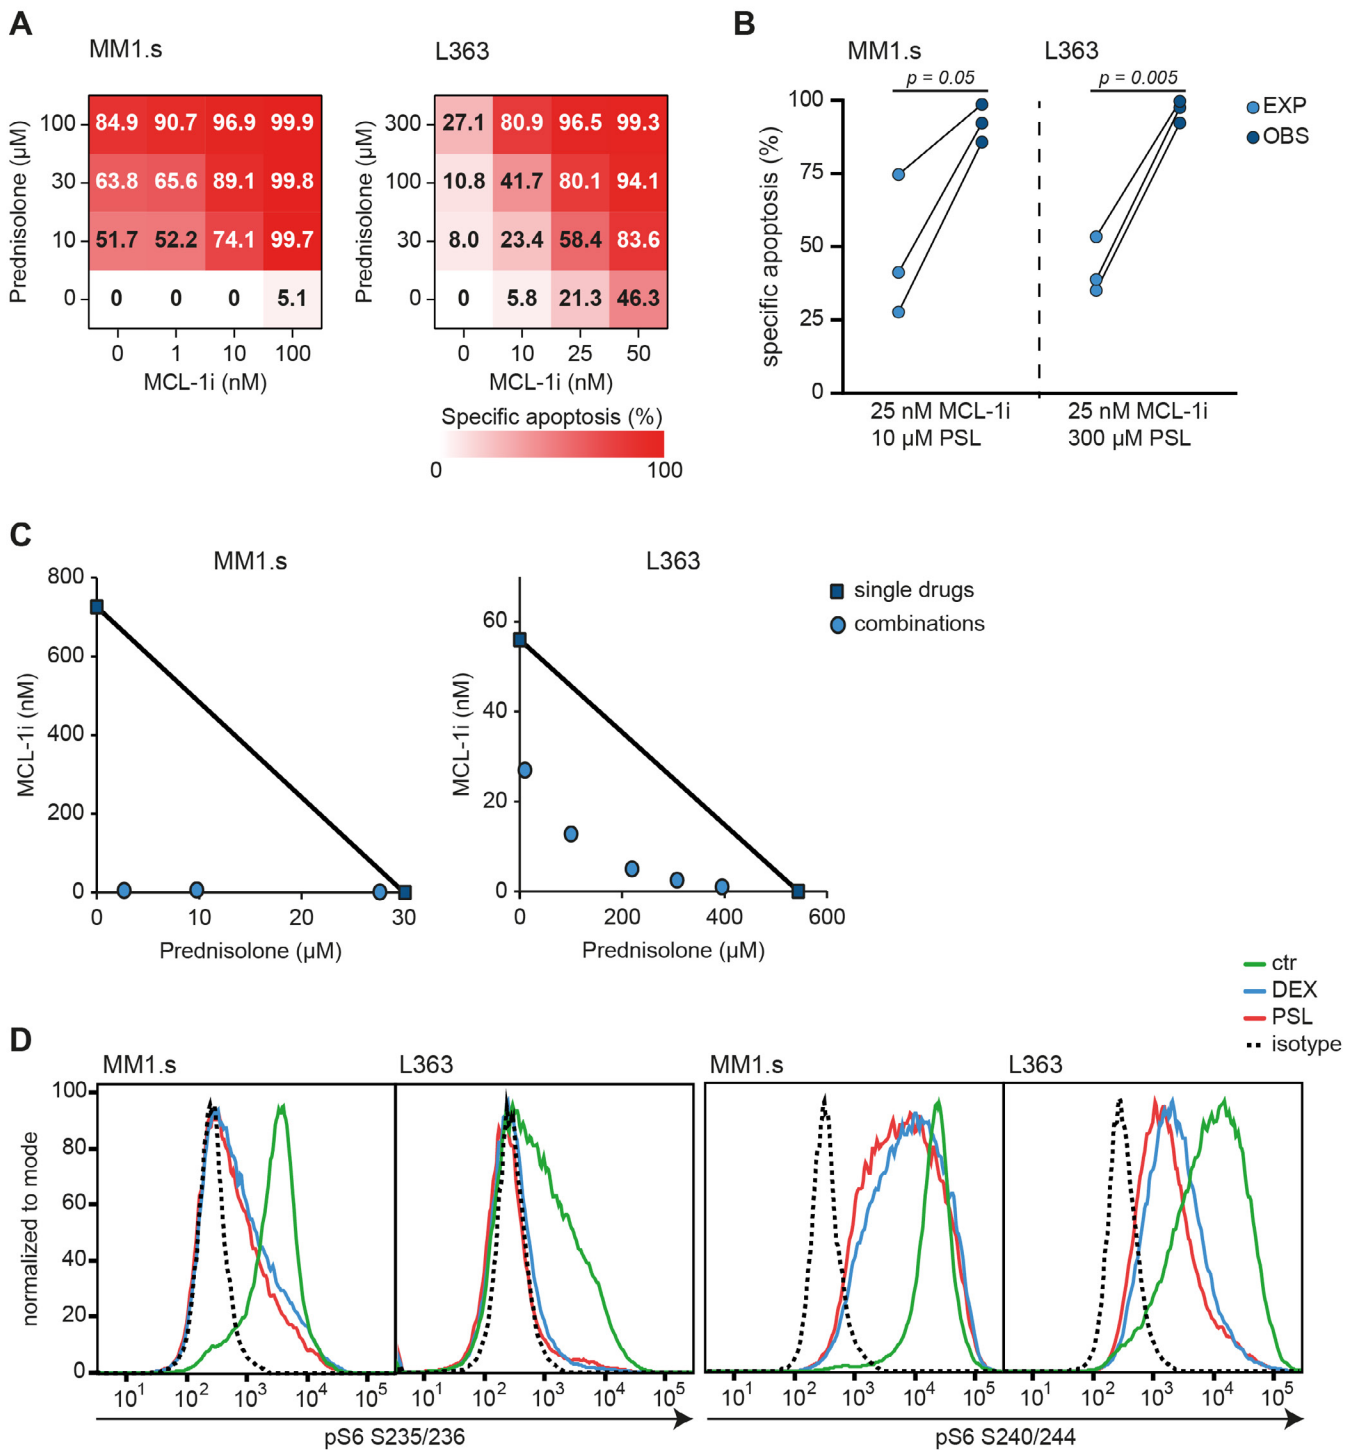

**Supplemental Figure 8. Prednisolone synergizes with MCL-1i to induce apoptosis of HMCLs and reduces phosphorylation of S6.** (A) Heatmaps showing specific apoptosis of indicated HMCLs induced by serial dilutions of prednisolone and MCL-1i, individual or combined. Viability was analyzed after 48 hours of drug exposure, values represent the mean of 3 individual experiments. (B) Plots comparing EXP to OBS specific apoptosis induced by prednisolone (PSL) and MCL-1i combinations. Per HMCL the drug combination that resulted in the highest average OBS-EXP ratio was selected from the data obtained in panel A. The 3 connected data points show the data obtained from 3 individual experiments. Statistical analysis was performed by paired t-tests. (C) Representative isobolograms of indicated HMCLs exposed to combinations of prednisolone and MCL-1i for 48 hours. Blue dots indicate the drug combination that induced 50% specific apoptosis ( $IC_{50}$ ), the blue squares indicate the  $IC_{50}$  of the single drugs. The black lines connecting both single drug data points indicate an exact additive effect with a CI of 1. All data points to the left of this line have a CI < 1,

indicating synergy for the drug combination. (D) Histograms comparing expression of S6 phosphorylation on serine residues 235/236 (pS6 S235/236) and 240/244 (pS6 S240/244) in indicated HMCLs after 4 hours of exposure to 1  $\mu$ M dexamethasone (DEX), 100  $\mu$ M PSL for MM1.s or 300  $\mu$ M PSL for L363, determined by flow cytometric analysis. Expression was relative to untreated control cells (ctr) and corrected for isotype control, indicated by the dashed line.

**Figure S9**

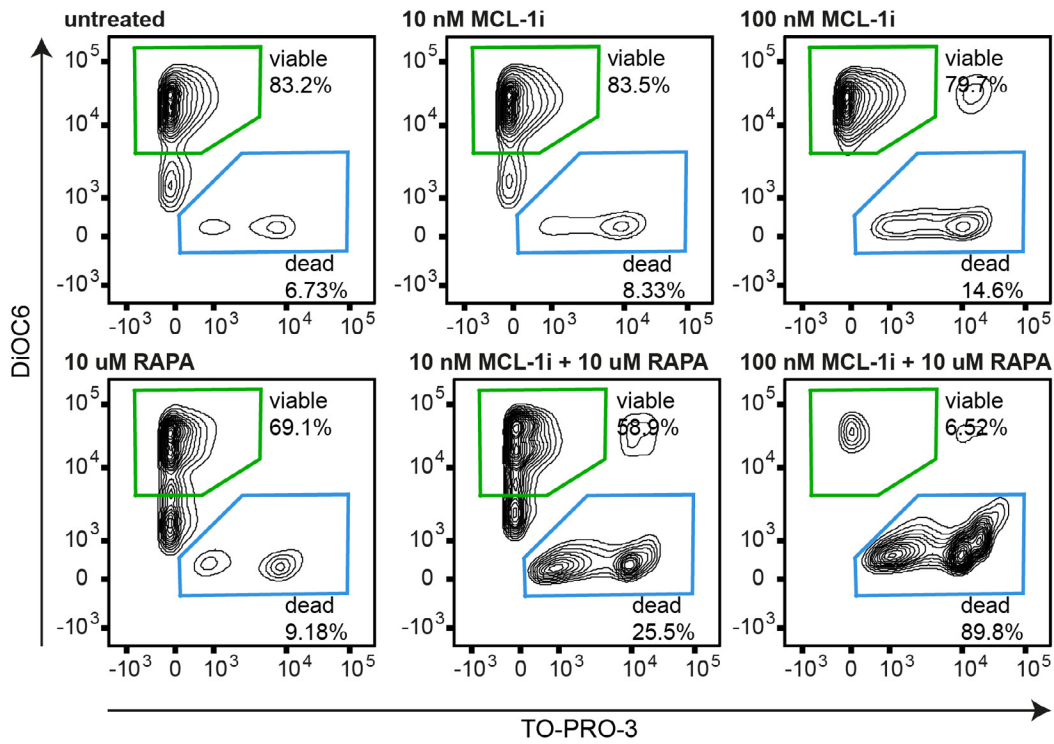

**Supplemental Figure 9. Induction of apoptosis by rapamycin and MCL-1i.** Representative flow cytometric analysis plots of apoptosis induction in HMCLs after 48 hours of exposure to the indicated concentrations of rapamycin (RAPA) and MCL-1i. Gates represent viable ( $\text{DiOC6}^+/\text{TO-PRO-3}^-$ ) and dead ( $\text{DiOC6}^-/\text{TO-PRO-3}^+$ ) MM1.s cells.

**Figure S10**

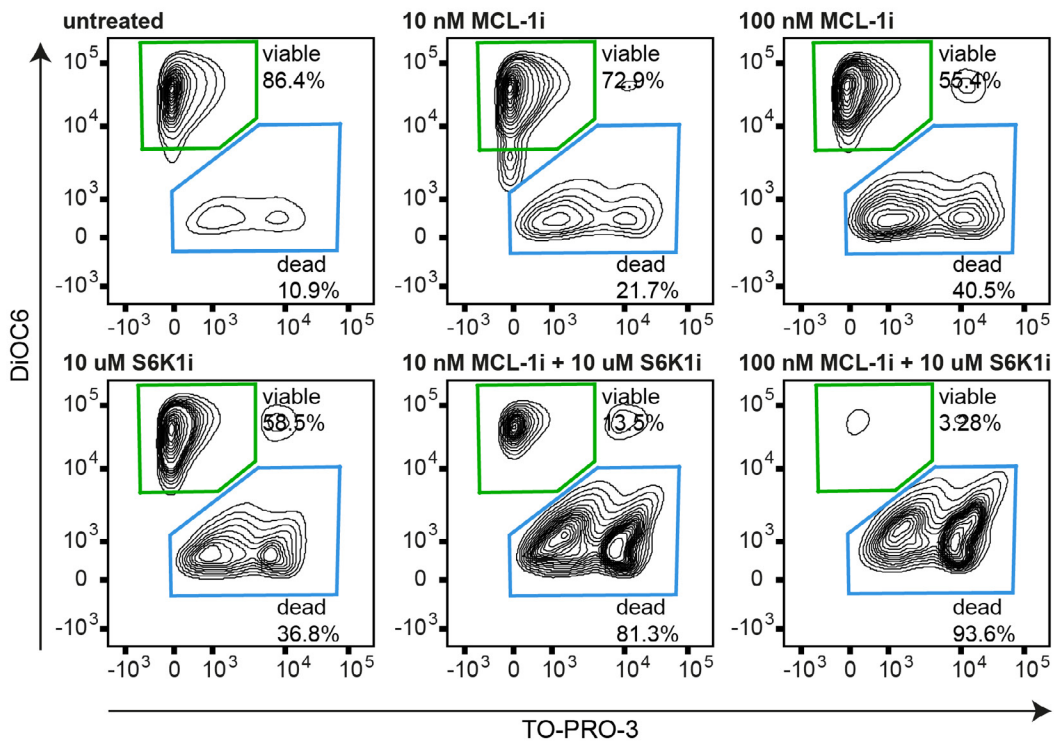

**Supplemental Figure 10. Induction of apoptosis by S6K1i and MCL-1i.** Representative flow cytometric analysis plots of apoptosis induction in HMCLs after 48 hours of exposure to the indicated concentrations of S6K1i and MCL-1i. Gates represent viable (DiOC6<sup>+</sup>/TO-PRO-3<sup>-</sup>) and dead (DiOC6<sup>-</sup>/TO-PRO-3<sup>+</sup>) MM1.s cells.

**Figure S11**

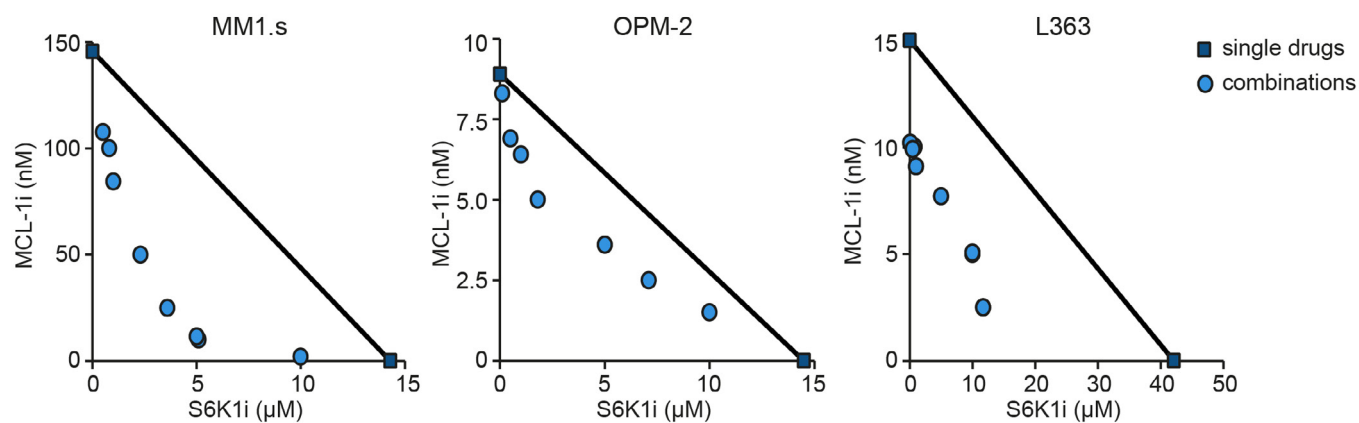

**Supplemental Figure 11. S6K1i synergizes with MCL-1i to induce apoptosis of HMCLs.** Representative isobolograms of indicated HMCLs exposed to combinations of S6K1i and MCL-1i for 48 hours. Blue dots indicate the drug combinations that induced 50% specific apoptosis (IC<sub>50</sub>). The blue squares indicate the IC<sub>50</sub> of the single drugs. The black lines connecting both single drug data points indicate an exact additive effect with a CI of 1. All data points to the left of this line have a CI < 1, indicating synergy for the drug combination.

**Figure S12**

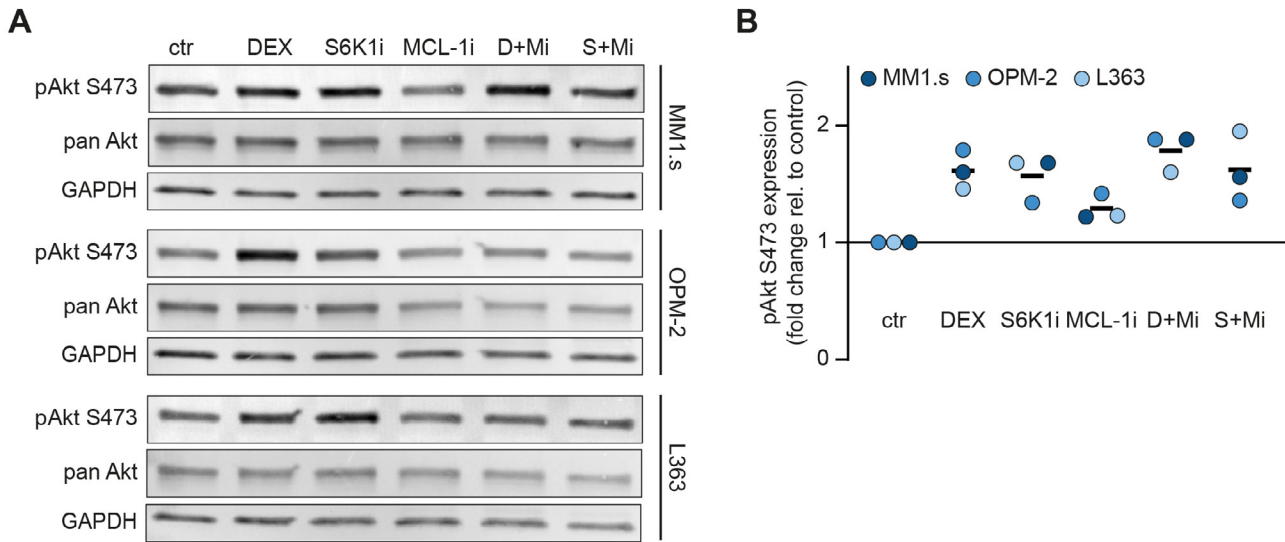

**Supplemental Figure 12. Dexamethasone and S6K1i have similar effects on Akt kinase activity.** (A) Representative western blot showing phosphorylation of Akt on the activating serine 473 residue (pAkt S473) in indicated HMCLs after 4 hours of exposure to 100 nM dexamethasone (DEX; D), 1  $\mu$ M S6K1i (S), MCL-1i (Mi; 100 nM for MM1.s and 25 nM for OPM-2 and L363) and combinations thereof, relative to pan Akt and GAPDH as a loading control. Ctr indicates untreated control cells. (B) Quantification of pAkt S473 expression, normalized to pan Akt protein expression and relative to untreated control cells (ctr). All datapoints show the mean quantification that was performed on western blots of 2 individual experiments as described for panel A. The black lines indicate the mean value of the 3 indicated HMCLs.



**Figure S13**

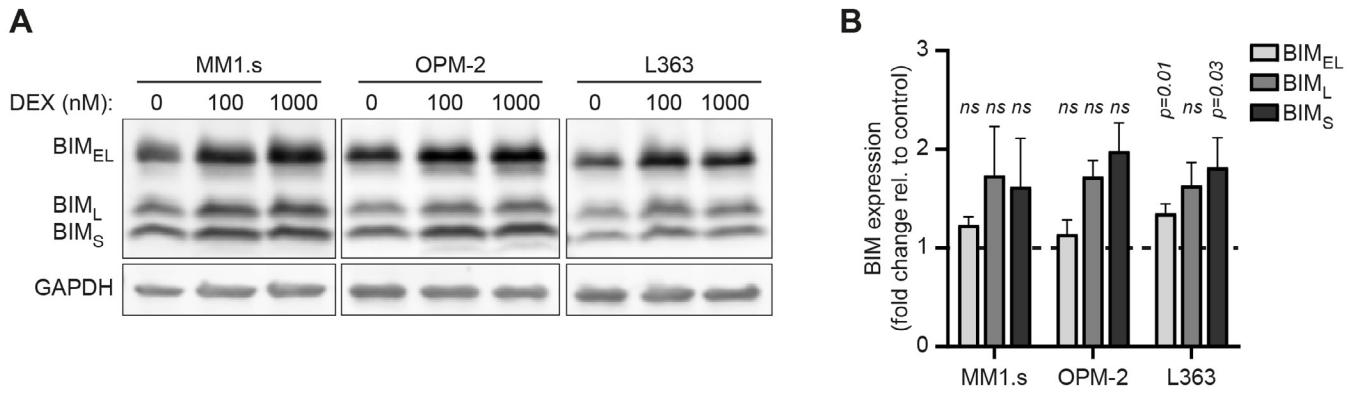

**Supplemental Figure 13. Exposure of HMCLs to dexamethasone increases BIM protein expression in a dose-dependent manner.** (A) Representative western blot showing protein expression of 3 BIM isoforms in indicated HMCLs exposed to indicated concentrations of dexamethasone (DEX) for 24 hours. (B) Quantification of 3 BIM isoforms protein expression in indicated HMCLs exposed to 1 μM dexamethasone for 24 hours. Quantification was performed on western blots of 3 individual experiments, normalized to GAPDH for loading control and relative to untreated control cells, indicated by the dashed line. Statistical analysis was performed by paired t-tests; ns, not significant.

**Figure S14**

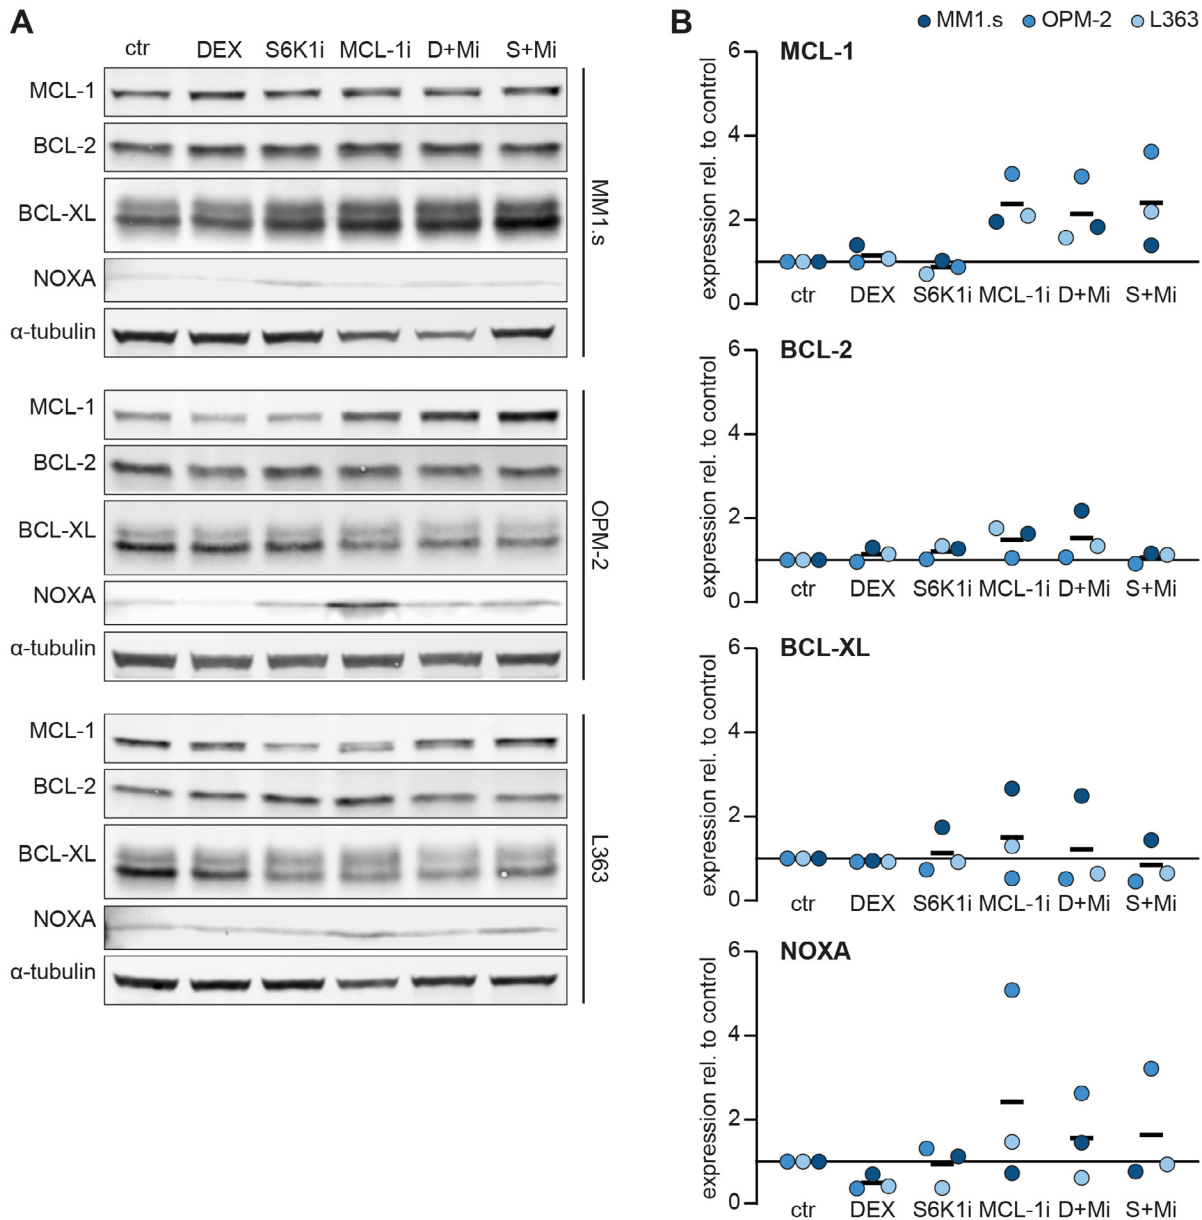

**Supplemental Figure 14. Exposure of HCMLs to dexamethasone, S6K1i, and MCL-1i do not consistently alter protein expression of BCL-2 family members.** (A) Representative western blot showing protein expression of pro-survival proteins MCL-1, BCL-2 and BCL-XL and BH3-only pro-apoptotic protein NOXA in indicated HMCLs exposed for 24 hours to 100 nM dexamethasone (DEX; D), 1  $\mu$ M S6K1i (S), MCL-1i (Mi; 100 nM for MM1.s and 25 nM for OPM-2 and L363) and combinations thereof in the presence of 10  $\mu$ M pan caspase inhibitor Q-VD-OPh, relative to  $\alpha$ -tubulin as a loading control. Ctr indicates untreated control cells. (B) Quantification of MCL-1, BCL-2, BCL-XL and NOXA protein expression, normalized to  $\alpha$ -tubulin protein expression and relative to untreated control cells (ctr). All datapoints show the mean quantification that was performed on western blots of 2 individual experiments as described for panel A. The black lines indicate the mean value of the 3 indicated HMCLs.

## Figure S15

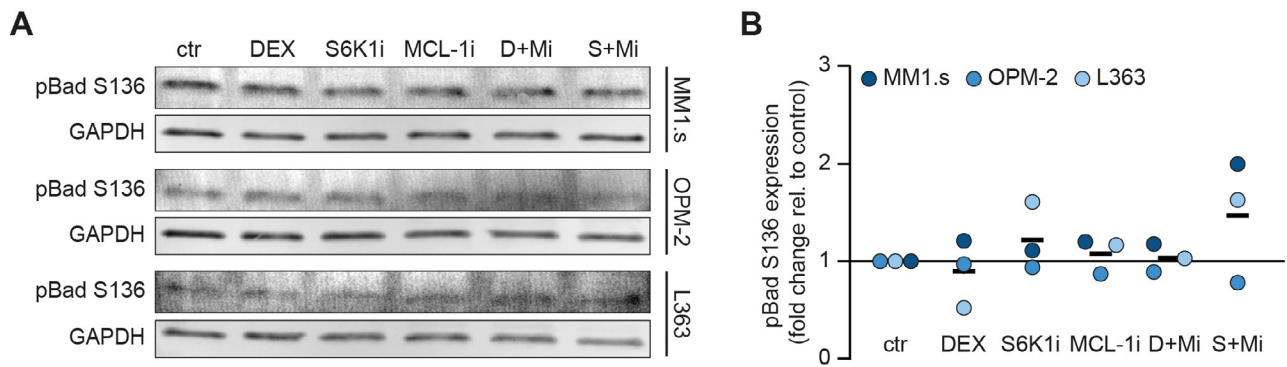

**Supplemental Figure 15. Exposure of HCMLs to dexamethasone, S6K1i, and MCL-1i do not consistently alter pro-apoptotic Bad activity.** (A) Representative western blot showing phosphorylation of Bad on the activating serine 136 residue (pBad S136) in indicated HMCLs exposed for 4 hours to 100 nM dexamethasone (DEX; D), 1 μM S6K1i (S), MCL-1i (Mi; 100 nM for MM1.s and 25 nM for OPM-2 and L363) and combinations thereof, relative to GAPDH as a loading control. Ctr indicates untreated control cells. (B) Quantification of pBad S136 protein expression, normalized to GAPDH protein expression and relative to untreated control cells. All datapoints show the mean quantification that was performed on western blots of 2 individual experiments as described for panel A. The black lines indicate the mean value of the 3 indicated HMCLs.

**Figure S16**

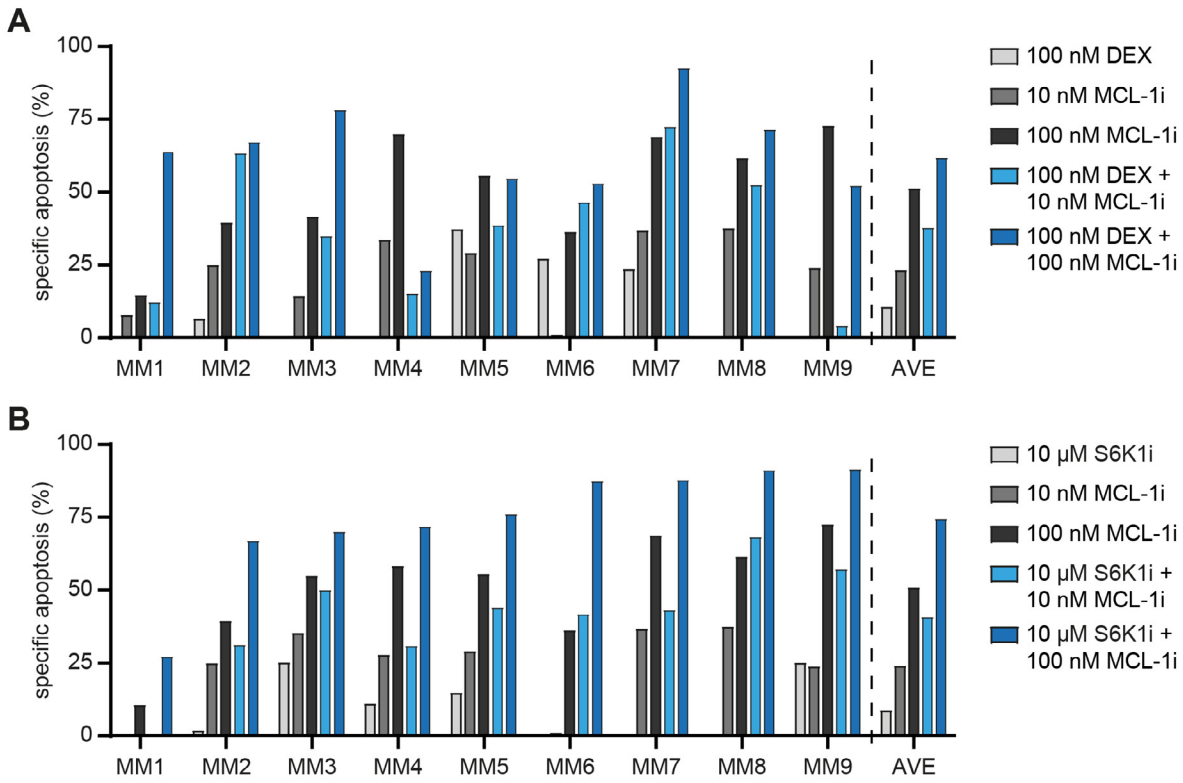

**Supplemental Figure 16. Induction of apoptosis by dexamethasone, S6K1i and MCL-1i in individual primary MM samples.** Specific apoptosis of CD38<sup>+</sup> primary MM cells after 48 hours of drug exposure. (A) Treatment with 100 nM dexamethasone (DEX), 10 nM MCL-1i, 100 nM MCL-1i or DEX-MCL-1i drug combinations. (B) Treatment with 10  $\mu$ M S6K1i, 10 nM MCL-1i, 100 nM MCL-1i or S6K1i-MCL-1i drug combinations. Mean values of the 9 primary MM patient samples (AVE) are represented by bars separated by the dashed line.

Figure S17

A

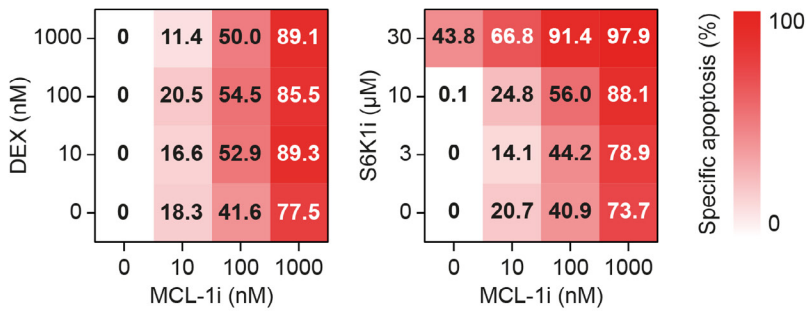

B

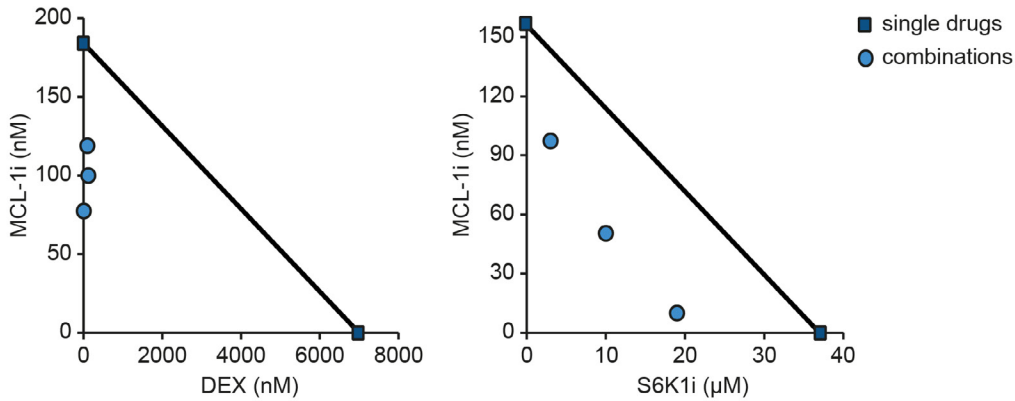

**Supplemental Figure 17. Dexamethasone and S6K1i synergize with MCL-1i to induce apoptosis of primary MM cells.** (A) Heatmaps showing specific apoptosis induced by single and combined serial dilutions of dexamethasone (DEX) and MCL-1i (left) or single and combined serial dilutions of S6K1i and MCL-1i (right). Viability of CD38<sup>+</sup> primary MM cells was analyzed after 48 hours of drug exposure, values represent the mean of 3 unique MM patient samples. (B) Isobolograms of the indicated drug combinations as described for panel A. Blue dots indicate the drug combination that induced 50% specific apoptosis (IC<sub>50</sub>), the blue squares indicate the IC<sub>50</sub> of the single drugs. For dexamethasone the IC<sub>50</sub> was > 7000 nM, but it was set to 7000 nM to be able to calculate CI values. The resulting CI (<1) therefore underestimates the synergistic effect with MCL-1i. All datapoints show the mean values of the 3 unique MM patient samples included, as in panel A.

**Figure S18**

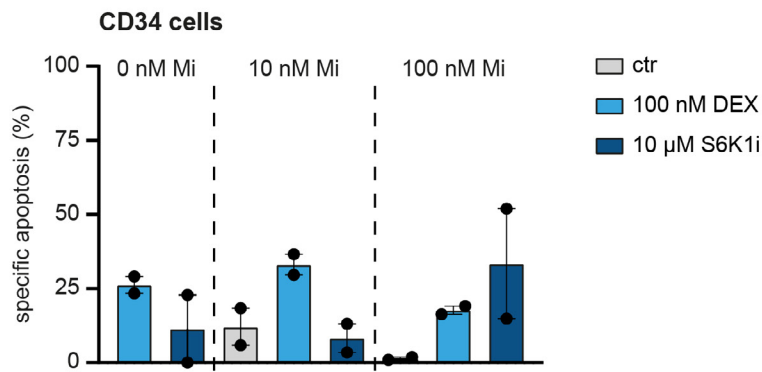

**Supplemental Figure 18. Dexamethasone and S6K1i induce limited toxicity in combination with MCL-1i in healthy donor CD34<sup>+</sup> stem and precursor cells.** Specific apoptosis induced by 100 nM dexamethasone (DEX) or 10 μM S6K1i as single drug dosages or in combination with 10 nM and 100 nM MCL-1i (Mi), relative to untreated control cells. Viability of CD34<sup>+</sup> cells was analyzed after 48 hours of drug exposure by negative TO-PRO-3 staining. The bars show the mean of the 2 unique healthy donor umbilical cord blood samples that were included, represented by the individual data points.

**Figure S19**

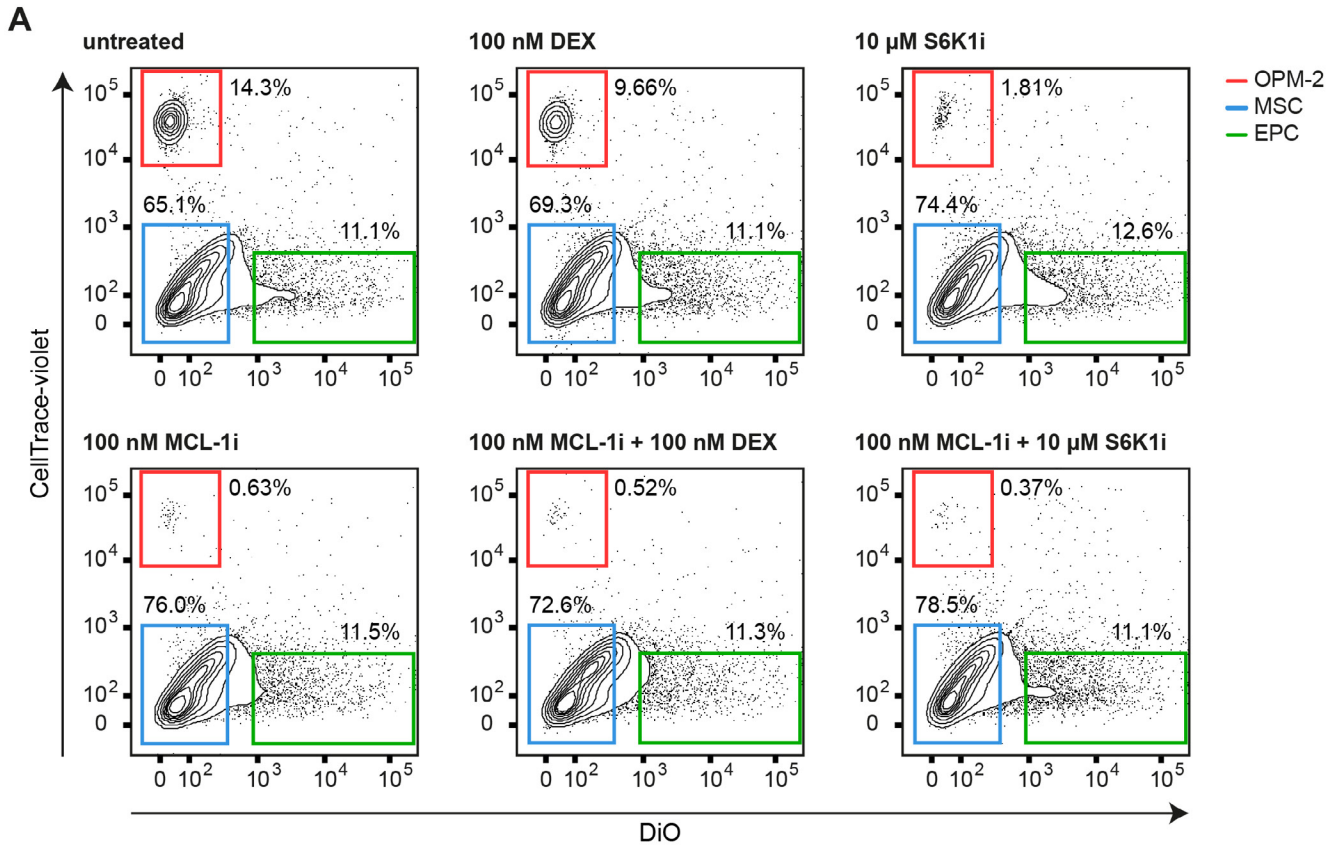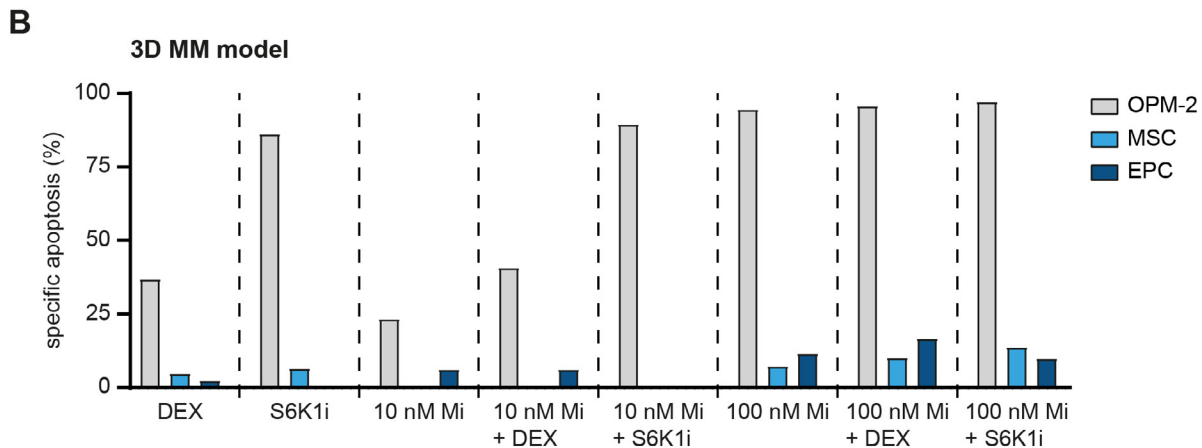

**Supplemental Figure 19. Dexamethasone-MCL-1i and S6K1i-MCL-1i combinations kill myeloma cells but induce minimal toxicity of stem and progenitor cells in a pre-clinical 3D MM model.** (A) Representative flow cytometric analysis plots showing relative contribution of OPM-2 (labeled with CellTrace-violet), EPC (labeled with DiO) and MSC (unlabeled) to the viable population of cells (pre-gated on TO-PRO-3 negative cells) after 48 hours of exposure to 100 nM dexamethasone (DEX), 10  $\mu$ M S6K1i, and 100 nM MCL-1i as single drug dosages or combinations thereof. (B) Quantification of specific apoptosis induced in OPM-2, MSC and EPC analyzed as described for panel A after 48 hours of exposure to DEX, S6K1i, and 10 nM or 100 nM MCL-1i (Mi), relative to untreated control cells. The plot combines the results of 2 individual experiments.
