# Supplementary material
Source: PubMed Central journal article supplement (PMC8270664)

Multiple Myeloma

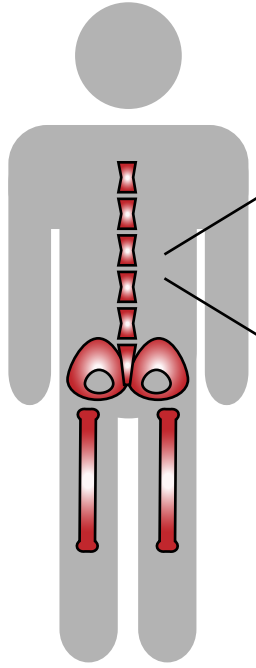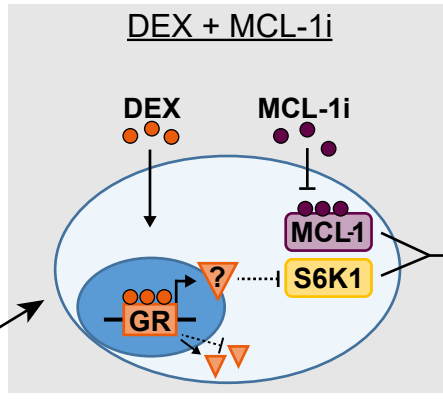

✓ Synergy: 6/9 pMM

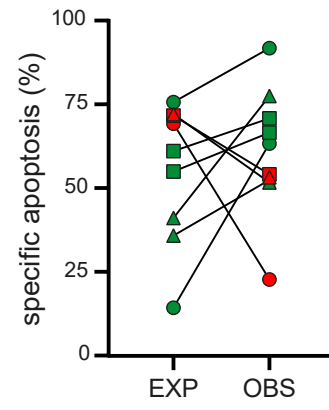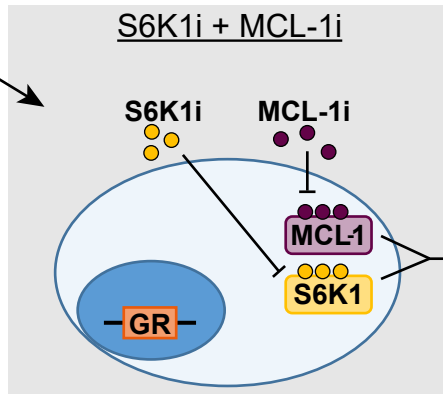

✓ Synergy: 9/9 pMM

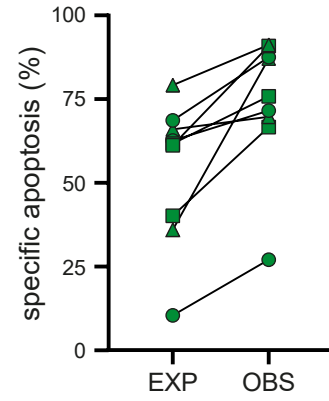

Supplement: advancesADV2020003624-suppl2.pdf [file advancesADV2020003624-suppl2.pdf]
